# Supplementary material
Source: PubMed Central journal article supplement (PMC5945347)
Supplement: NIHMS914911-supplement-supplement_1.pdf [file NIHMS914911-supplement-supplement_1.pdf]

**ONLINE REPOSITORY MATERIALS**

**Table E1.** Sampling, baseline participation, and 6-month follow-up weights by EHR selection groups and race/ethnicity used for estimation of prevalence of transition states in source population

| <b>EHR Selection Groups<sup>a</sup></b> | <b>Race/ethnicity</b> | <b>Source, n</b> | <b>Mailed Baseline, n</b> | <b>Proportion Mailed Baseline (x1)</b> | <b>Returned Baseline, n</b> | <b>Proportion Returned Baseline (x2)</b> | <b>Returned 6-month Follow-up, n</b> | <b>Proportion Returned Follow-up (x3)</b> | <b>Analysis Weights<sup>b</sup></b> |
|-----------------------------------------|-----------------------|------------------|---------------------------|----------------------------------------|-----------------------------|------------------------------------------|--------------------------------------|-------------------------------------------|-------------------------------------|
| CRS codes                               | White                 | 13,132           | 12,209                    | 0.92971                                | 4730                        | 0.38742                                  | 3095                                 | 0.65433                                   | 4.24301                             |
|                                         | Black                 | 170              | 159                       | 0.93529                                | 35                          | 0.22013                                  | 17                                   | 0.48571                                   | 9.99994                             |
|                                         | Hispanic              | 192              | 181                       | 0.94271                                | 35                          | 0.19337                                  | 19                                   | 0.54286                                   | 10.10520                            |
|                                         | Total                 | 13,494           | 12,549                    | 0.92997                                | 4800                        | 0.38250                                  | 3131                                 | 0.65229                                   | 4.30982                             |
| Asthma or allergy codes                 | White                 | 47,892           | 4224                      | 0.08820                                | 1489                        | 0.35251                                  | 955                                  | 0.64137                                   | 50.14774                            |
|                                         | Black                 | 991              | 903                       | 0.91120                                | 147                         | 0.16279                                  | 69                                   | 0.46939                                   | 14.36232                            |
|                                         | Hispanic              | 1035             | 966                       | 0.93333                                | 207                         | 0.21429                                  | 93                                   | 0.44928                                   | 11.12873                            |
|                                         | Total                 | 49,918           | 6093                      | 0.12206                                | 1843                        | 0.30248                                  | 1117                                 | 0.60608                                   | 44.68894                            |
| None of these codes                     | White                 | 131,366          | 2775                      | 0.02112                                | 876                         | 0.31568                                  | 554                                  | 0.63242                                   | 237.16654 <sup>c</sup>              |
|                                         | Black                 | 2,832            | 1109                      | 0.39160                                | 160                         | 0.14427                                  | 65                                   | 0.40625                                   | 43.57004                            |
|                                         | Hispanic              | 3,159            | 1174                      | 0.37164                                | 168                         | 0.14310                                  | 99                                   | 0.58929                                   | 31.90868                            |
|                                         | Total                 | 137,357          | 5058                      | 0.03682                                | 1204                        | 0.23804                                  | 718                                  | 0.59635                                   | 191.32206                           |
| Total                                   | White                 | 192,390          | 19,208                    | 0.09984                                | 7095                        | 0.36938                                  | 4604                                 | 0.64891                                   | 41.78665                            |
|                                         | Black                 | 3,993            | 2171                      | 0.54370                                | 342                         | 0.15753                                  | 151                                  | 0.44152                                   | 26.44399                            |
|                                         | Hispanic              | 4,386            | 2321                      | 0.52918                                | 410                         | 0.17665                                  | 211                                  | 0.51463                                   | 20.78681                            |
|                                         | Total                 | 200,769          | 23,700                    | 0.11805                                | 7847                        | 0.33110                                  | 4966                                 | 0.63285                                   | 40.42724                            |

<sup>a</sup> Primary care patients were selected and mailed to, based on evidence of CRS, asthma, and allergic conditions in EHR: CRS codes = two or more ICD-9 codes 471.x or 473.x or CPT codes for sinus surgery, sinus endoscopy or sinus CT; asthma or allergy codes = one ICD-9 code for 471.x or 473.x or two or more ICD-9 codes for asthma (493.x) or allergic rhinitis (477.x); none of these codes = does not meet criteria for above groups

<sup>b</sup> Sample weight = 1/(x1\*x2\*x3)

<sup>c</sup> This weight was untruncated for the prevalence estimates and truncated to 32.16387 for survey regression; sample weight = 1/(x1\*x2) for survey regression

**Abbreviations:** CPT = Current Procedural Terminology; CRS = chronic rhinosinusitis; CT = computed tomography; EHR = electronic health record; ICD-9 = International Classification of Diseases

**Table E2.** Final latent class model consisting of nine questions with overall prevalence of an affirmative response in all subjects and the ratios of the prevalence of affirmative responses in latent class vs all subjects<sup>a</sup>

| Q#  | Label                            | Prevalence in All Subjects | Pan-symptomatic <sup>b</sup> | Ratio <sup>c</sup> | CRS nasal and sinus symptoms <sup>b</sup> | Ratio <sup>c</sup> | Less frequent symptoms <sup>b</sup> | Ratio <sup>c</sup> | Headache symptoms <sup>b</sup> | Ratio <sup>c</sup> |
|-----|----------------------------------|----------------------------|------------------------------|--------------------|-------------------------------------------|--------------------|-------------------------------------|--------------------|--------------------------------|--------------------|
| q16 | Both blocked                     | 0.1027                     | 0.6429                       | <b>6.26</b>        | 0.3535                                    | <b>3.44</b>        | 0.0200                              | 0.19               | 0.1040                         | 1.01               |
| q20 | Blow nose 10+ times              | 0.1606                     | 0.6903                       | <b>4.30</b>        | 0.5484                                    | <b>3.42</b>        | 0.0464                              | 0.29               | 0.1723                         | 1.07               |
| q23 | Lump in throat                   | 0.1370                     | 0.7897                       | <b>5.77</b>        | 0.4050                                    | <b>2.96</b>        | 0.0299                              | 0.22               | 0.2114                         | 1.54               |
| q25 | Not smell anything               | 0.0645                     | 0.3687                       | <b>5.71</b>        | 0.1885                                    | <b>2.92</b>        | 0.0255                              | 0.39               | 0.0468                         | 0.73               |
| q27 | Facial pain 5+                   | 0.0763                     | 0.7167                       | <b>9.39</b>        | 0.1076                                    | 1.41               | 0.0084                              | 0.11               | 0.2158                         | <b>2.83</b>        |
| q40 | Eye itching                      | 0.1281                     | 0.6295                       | <b>4.91</b>        | 0.2833                                    | 2.21               | 0.0419                              | 0.33               | 0.2598                         | 2.03               |
| q72 | Wheeze, tight, whistle with cold | 0.0611                     | 0.4359                       | <b>7.14</b>        | 0.1270                                    | 2.08               | 0.0165                              | 0.27               | 0.1151                         | 1.88               |
| q83 | HA photophobia                   | 0.1308                     | 0.7117                       | <b>5.44</b>        | 0.0371                                    | 0.28               | 0.0417                              | 0.32               | 0.5252                         | <b>4.01</b>        |
| q89 | Fatigue interferes               | 0.1943                     | 0.7733                       | <b>3.98</b>        | 0.2785                                    | 1.43               | 0.0728                              | 0.37               | 0.5572                         | <b>2.87</b>        |
|     | <i>Number (%) in class</i>       |                            | 246 (3.3%)                   |                    | 941 (12.6%)                               |                    | 5508 (73.8%)                        |                    | 773 (10.4%)                    |                    |

<sup>a</sup> Latent class analysis: final model with four latent classes using five secondary CRS questions and one each for allergy, asthma, migraine, and fatigue. This analysis allowed identification of four latent classes namable as pan-symptomatic, CRS nasal and sinus symptoms, less frequent symptoms, and headache symptoms.

<sup>b</sup> Percentages with affirmative response

<sup>c</sup> Divides prevalence in class by overall prevalence; highlighted cells support the conclusion about what the latent class represents, consistent with the way each latent class was named.

**Abbreviations:** CRS = chronic rhinosinusitis; HA = headache; Q = question

**Table E3.** Selected demographic variables by categories of follow-up status (current vs. not current CRS) on the 6-month questionnaire by baseline status (current, past, and never), resulting in six longitudinal symptom subgroups<sup>a</sup>

| Characteristic <sup>b</sup>                                  | CRS Current at Baseline<br>n = 1143        |                                                | CRS Past at Baseline<br>n = 1249           |                                                 | CRS Never at Baseline<br>n = 2344         |                                                 |
|--------------------------------------------------------------|--------------------------------------------|------------------------------------------------|--------------------------------------------|-------------------------------------------------|-------------------------------------------|-------------------------------------------------|
|                                                              | Follow-up Status<br>Current CRS<br>n = 558 | Follow-up Status<br>Not Current CRS<br>n = 585 | Follow-up Status<br>Current CRS<br>n = 190 | Follow-up Status<br>Not Current CRS<br>n = 1059 | Follow-up Status<br>Current CRS<br>n = 83 | Follow-up Status<br>Not Current CRS<br>n = 2261 |
| Group label                                                  | Persistent                                 | Non-persistent                                 | Recurrent                                  | Stable past                                     | Incident                                  | Never                                           |
| Age of onset (vs. 0-15 years) <sup>c</sup>                   |                                            |                                                |                                            |                                                 |                                           |                                                 |
| 0-15 years, n = 615                                          | 21.4                                       | 18.5                                           | 23.1                                       | 19.8                                            | 16.7                                      | 16.0                                            |
| 16-30 years, n = 1087                                        | 35.7                                       | 36.0                                           | 34.6                                       | 34.0                                            | 25.0                                      | 29.4                                            |
| 31-45 years, n = 769                                         | 22.9                                       | 26.7                                           | 24.7                                       | 23.8                                            | 28.3                                      | 22.5                                            |
| 46-60 years, n = 547                                         | 14.8                                       | 12.6                                           | 14.8                                       | 17.4                                            | 18.3                                      | 20.1                                            |
| >60 years, n = 240                                           | 5.3                                        | 6.3                                            | 2.8                                        | 5.0                                             | 11.7                                      | 12.2                                            |
| Hay fever, physician-diagnosed, n = 2222                     | 56.5                                       | 56.8                                           | 56.3                                       | 53.6                                            | 39.8                                      | 34.8                                            |
| Asthma, physician-diagnosed, n = 1246                        | 29.8                                       | 35.9                                           | 34.4                                       | 31.5                                            | 19.5                                      | 18.8                                            |
| Asthma, symptom based <sup>d</sup> , n = 1777                | 63.0                                       | 57.1                                           | 49.5                                       | 39.6                                            | 21.4                                      | 35.7                                            |
| Migraine headache <sup>e</sup> , n = 1005                    | 49.3                                       | 40.5                                           | 34.1                                       | 23.9                                            | 28.8                                      | 10.9                                            |
| Any treatment <sup>f</sup> , n = 3620                        | 92.1                                       | 92.0                                           | 92.5                                       | 86.3                                            | 79.0                                      | 56.7                                            |
| Intranasal steroid, n = 2210                                 | 68.0                                       | 64.8                                           | 64.8                                       | 57.5                                            | 48.8                                      | 28.4                                            |
| Intranasal anti-histamine, n = 582                           | 21.7                                       | 23.9                                           | 21.2                                       | 13.6                                            | 12.8                                      | 5.4                                             |
| CRS surgery at baseline, n = 690                             | 24.4                                       | 20.9                                           | 21.6                                       | 23.0                                            | 6.0                                       | 5.4                                             |
| LCA class at baseline <sup>g</sup> , n = 1374                |                                            |                                                |                                            |                                                 |                                           |                                                 |
| Less frequent symptoms                                       | 19.1                                       | 28.6                                           | 17.5                                       | 45.7                                            | 17.7                                      | 66.8                                            |
| Pan-symptomatic                                              | 22.4                                       | 9.6                                            | 0                                          | 1.6                                             | 0                                         | 0                                               |
| Headache symptoms                                            | 17.4                                       | 19.8                                           | 39.7                                       | 28.7                                            | 52.9                                      | 23.3                                            |
| CRS nasal and sinus symptoms                                 | 41.2                                       | 42.0                                           | 42.0                                       | 24.0                                            | 29.4                                      | 9.9                                             |
| CRS EPOS subgroup at baseline, n = 1195                      |                                            |                                                |                                            |                                                 |                                           |                                                 |
| OBS/DC, n = 418                                              | 27.2                                       | 42.2                                           | -                                          | -                                               | -                                         | -                                               |
| PP, n = 427                                                  | 36.6                                       | 35.2                                           | -                                          | -                                               | -                                         | -                                               |
| SL, n = 217                                                  | 21.9                                       | 14.2                                           | -                                          | -                                               | -                                         | -                                               |
| PPSL, n = 133                                                | 14.3                                       | 8.4                                            | -                                          | -                                               | -                                         | -                                               |
| Minor CRS symptoms quartiles <sup>h</sup> , n = 4948         |                                            |                                                |                                            |                                                 |                                           |                                                 |
| Q1, n = 1330                                                 | 4.7                                        | 4.3                                            | 9.6                                        | 16.0                                            | 23.2                                      | 44.0                                            |
| Q2, n = 1371                                                 | 12.0                                       | 15.9                                           | 21.3                                       | 33.3                                            | 28.0                                      | 32.8                                            |
| Q3, n = 1089                                                 | 24.8                                       | 30.1                                           | 29.8                                       | 28.9                                            | 24.4                                      | 15.6                                            |
| Q4, n = 1158                                                 | 58.5                                       | 49.7                                           | 39.3                                       | 21.8                                            | 24.4                                      | 7.7                                             |
| Lower respiratory symptoms quartiles <sup>i</sup> , n = 4923 |                                            |                                                |                                            |                                                 |                                           |                                                 |
| Q1, n = 1712                                                 | 15.5                                       | 20.0                                           | 21.8                                       | 32.2                                            | 31.7                                      | 45.8                                            |

|                                                                                                                                                                                                                                                                                                                                                                            |      |      |      |      |      |      |
|----------------------------------------------------------------------------------------------------------------------------------------------------------------------------------------------------------------------------------------------------------------------------------------------------------------------------------------------------------------------------|------|------|------|------|------|------|
| Q2, n = 764                                                                                                                                                                                                                                                                                                                                                                | 12.8 | 11.0 | 13.3 | 15.8 | 20.7 | 17.4 |
| Q3, n = 1166                                                                                                                                                                                                                                                                                                                                                               | 23.4 | 26.5 | 26.6 | 24.9 | 23.2 | 22.4 |
| Q4, n = 1281                                                                                                                                                                                                                                                                                                                                                               | 48.3 | 42.5 | 38.3 | 27.1 | 24.4 | 14.4 |
| Allergy symptoms quartiles <sup>d</sup> , n = 4942                                                                                                                                                                                                                                                                                                                         |      |      |      |      |      |      |
| Q1, n = 1616                                                                                                                                                                                                                                                                                                                                                               | 9.0  | 11.6 | 19.1 | 25.3 | 31.7 | 48.0 |
| Q2, n = 1219                                                                                                                                                                                                                                                                                                                                                               | 17.5 | 19.0 | 20.7 | 28.5 | 23.2 | 26.8 |
| Q3, n = 1406                                                                                                                                                                                                                                                                                                                                                               | 36.3 | 40.5 | 32.5 | 34.1 | 28.0 | 20.5 |
| Q4, n = 701                                                                                                                                                                                                                                                                                                                                                                | 37.2 | 28.9 | 27.7 | 12.2 | 17.1 | 4.7  |
| <sup>a</sup> Unknown CRS status at 6-month follow-up questionnaire, n = 230                                                                                                                                                                                                                                                                                                |      |      |      |      |      |      |
| <sup>b</sup> Percentages are reported as column %                                                                                                                                                                                                                                                                                                                          |      |      |      |      |      |      |
| <sup>c</sup> Obtained from baseline questionnaire                                                                                                                                                                                                                                                                                                                          |      |      |      |      |      |      |
| <sup>d</sup> Some, most or all of the time to at least one of four questions- non-viral wheezing, nocturnal wheezing, exercise induced wheezing and non-viral nocturnal cough in the past 12 months                                                                                                                                                                        |      |      |      |      |      |      |
| <sup>e</sup> Migraine was based on previously validated scale utilizing three questions- disability, nausea and light sensitivity with headache                                                                                                                                                                                                                            |      |      |      |      |      |      |
| <sup>f</sup> The treatment choices were antibiotics, oral and intranasal steroids, oral and intranasal anti-histamine, decongestants.                                                                                                                                                                                                                                      |      |      |      |      |      |      |
| <sup>g</sup> Latent Class Analysis (LCA) to quantitatively evaluate symptom clustering, with final model having 9 questions- 5 CRS questions and 1 each for allergy, asthma, migraine, fatigue                                                                                                                                                                             |      |      |      |      |      |      |
| <sup>h</sup> Headache, fevers, coughing, bad breath, fatigue, ear fullness, ear pain, and ear pressure in the past 3 months: take mean of the 5-point rating scale responses to these questions and quartile                                                                                                                                                               |      |      |      |      |      |      |
| <sup>i</sup> Wheezing, chest tightness, shortness of breath in the past 3 months: take mean of the 5-point rating scale responses to these questions and quartile                                                                                                                                                                                                          |      |      |      |      |      |      |
| <sup>j</sup> Nasal itching, sneezing, eye itching, eye tearing in the past 3 months: take mean of the 5-point rating scale responses to these questions and quartile                                                                                                                                                                                                       |      |      |      |      |      |      |
| <u>Abbreviations:</u> CRS = chronic rhinosinusitis; EPOS = European Position Paper on Rhinosinusitis; OBS/DC = obstruction and discharge only; PP = pain and/or pressure with at least one cardinal symptom (obstruction and or discharge); PPSL = pain and/or pressure, smell loss, and at least one cardinal symptom; SL = smell loss with at least one cardinal symptom |      |      |      |      |      |      |
